# Supplementary material for: Early detection of chronic hepatitis B and risk factor assessment in Turkish migrants, Middle Limburg, Belgium
Source: PLOS journal article supplement (doi:10.1371/journal.pone.0234740), 2020-07-27
Supplement: S9 (10.1371/journal.pone.0234740.s009) [file journal.pone.0234740.s009]

**S9 Table. Association of past or recent hepatitis B virus infection to different risk factors among first-generation migrants (n = 628) (weighted GEE model).**

| Parameter                                                   |                                                                  | Estimate (SE)               | p-value | aOR (95% CI)                              |
|-------------------------------------------------------------|------------------------------------------------------------------|-----------------------------|---------|-------------------------------------------|
| (intercept)                                                 |                                                                  | -2.42 (0.32)                |         |                                           |
| Age group                                                   | 40 – 59 years (vs 18 – 39 years)<br>60+ years (vs 18 – 39 years) | 1.09 (0.31)<br>1.77 (0.34 ) | <.001   | 2.99 (1.62 – 5.50)<br>5.84 (3.01 – 11.34) |
| HBV infected mother                                         | Yes (vs No/Unknown)                                              | 0.92 (0.42)                 | .042    | 2.51 (1.10 – 5.70)                        |
| HBV infected siblings                                       | Yes (vs No/Unknown)                                              | 1.05 (0.42)                 | .024    | 2.86 (1.26 – 6.49)                        |
| Gynaecological examination in Turkey or unsafe circumcision | Yes (vs No/Unknown)                                              | 0.64 (0.18)                 | <.001   | 1.90 (1.34 – 2.70)                        |
| Treatment with needles in Turkey                            | Yes (vs No/Unknown)                                              | 0.57 (0.19)                 | .003    | 1.77 (1.23 – 2.54)                        |

Abbreviation: GEE: generalized estimating equations; SE: standard error; aOR: adjusted odds ratio; CI: confidence interval; HBV: hepatitis

B virus.

First-generation migrants: foreign-born individuals; unsafe circumcision: collective circumcision and/or circumcision not carried out by medical doctor.
