# Supplementary material for: Early detection of chronic hepatitis B and risk factor assessment in Turkish migrants, Middle Limburg, Belgium
Source: PLOS journal article supplement (doi:10.1371/journal.pone.0234740), 2020-07-27
Supplement: S11 (10.1371/journal.pone.0234740.s011) [file journal.pone.0234740.s011]

**S11 Table. Prevalence of chronic hepatitis B virus infection by different risk factors among the total population (n = 1,081) (weighted univariate GEE).**

|                                         |  | N  | N     | Prevalence (%) | P value | Crude OR (95% CI)   |
|-----------------------------------------|--|----|-------|----------------|---------|---------------------|
| Overall                                 |  | 26 | 1,081 | 2.4%           | -       | -                   |
| Gender                                  |  |    |       |                | .046    |                     |
| Male                                    |  | 18 | 468   | 3.8%           |         | 2.55 (1.02 – 6.38)  |
| Female                                  |  | 8  | 613   | 1.3%           |         | (ref)               |
| Age group                               |  |    |       |                | .005    |                     |
| 18-39 years                             |  | 4  | 433   | 0.9%           |         | (ref)               |
| 40-59 years                             |  | 15 | 511   | 2.9%           |         | 4.28 (1.35 – 13.62) |
| ≥ 60 years                              |  | 7  | 137   | 5.1%           |         | 6.14 (1.63 – 23.19) |
| Ethnicity                               |  |    |       |                | .070    |                     |
| FGM                                     |  | 19 | 628   | 3.0%           |         | 2.15 (0.86 – 5.39)  |
| SGM                                     |  | 7  | 453   | 1.5%           |         | (ref)               |
| Year of immigration (if FGM)            |  |    |       |                | .190    |                     |
| Before 1987                             |  | 13 | 363   | 3.6%           |         | 1.90 (0.86 – 5.39)  |
| Year 1987 or later                      |  | 6  | 264   | 2.3%           |         | (ref)               |
| Southeastern Anatolian origin of mother |  |    |       |                | .604    |                     |
| Yes                                     |  | 2  | 59    | 3.4%           |         | 1.61 (0.37 – 7.00)  |
| No                                      |  | 24 | 971   | 2.5%           |         | (ref)               |
| Mother's educational level              |  |    |       |                | -       | -                   |
| None                                    |  | 15 | 570   | 2.6%           |         |                     |
| Primary school                          |  | 10 | 370   | 2.7%           |         |                     |

|                                  |  |    |       |       |      |                      |
|----------------------------------|--|----|-------|-------|------|----------------------|
| Secondary school                 |  | 0  | 123   | 0.0%  |      |                      |
| High school/University           |  | 1  | 13    | 7.7%  |      |                      |
| HBV infected partner             |  |    |       |       | -    | -                    |
| Yes                              |  | 0  | 25    | 0.0%  |      |                      |
| No/Unknown                       |  | 26 | 1,056 | 2.5%  |      |                      |
| HBV infected mother              |  |    |       |       | .924 |                      |
| Yes                              |  | 1  | 37    | 2.7%  |      | 1.12 (0.10 – 12.22)  |
| No/Unknown                       |  | 25 | 1,044 | 2.4%  |      | (ref)                |
| HBV infected father              |  |    |       |       | -    | -                    |
| Yes                              |  | 0  | 24    | 0.0%  |      |                      |
| No/Unknown                       |  | 26 | 1,057 | 2.5%  |      |                      |
| HBV infected siblings            |  |    |       |       | .025 |                      |
| Yes                              |  | 7  | 45    | 15.6% |      | 10.57 (2.88 – 38.82) |
| No/Unknown                       |  | 19 | 1,036 | 1.8%  |      | (ref)                |
| HBV infected other family member |  |    |       |       | .111 |                      |
| Yes                              |  | 5  | 70    | 7.1%  |      | 4.23 (1.49 – 12.03)  |
| No/Unknown                       |  | 21 | 1,011 | 2.1%  |      | (ref)                |
| Sharing toothbrushes regularly   |  |    |       |       | .090 |                      |
| Yes                              |  | 9  | 188   | 4.8%  |      | 2.52 (1.06 – 5.99)   |
| No                               |  | 17 | 892   | 1.9%  |      | (ref)                |
| Sharing nail clippers            |  |    |       |       | .961 |                      |
| Yes                              |  | 24 | 991   | 2.4%  |      | 1.04 (0.24 – 4.49)   |
| No                               |  | 2  | 89    | 2.2%  |      | (ref)                |
| Sharing razors                   |  |    |       |       | .602 |                      |
| Yes                              |  | 5  | 170   | 2.9%  |      | 1.37 (0.46 – 4.06)   |

|                                                             |  |    |     |      |      |                     |
|-------------------------------------------------------------|--|----|-----|------|------|---------------------|
| No                                                          |  | 21 | 910 | 2.3% |      | (ref)               |
| Sharing used towels                                         |  |    |     |      | .804 |                     |
| Yes                                                         |  | 22 | 945 | 2.3% |      | 0.86 (0.28 – 2.69)  |
| No                                                          |  | 4  | 135 | 3.0% |      | (ref)               |
| Eating from the same plate at least once                    |  |    |     |      | .708 |                     |
| Yes                                                         |  | 23 | 927 | 2.5% |      | 1.25 (0.36 – 4.34)  |
| No                                                          |  | 3  | 153 | 2.0% |      | (ref)               |
| Gynaecological examination in Turkey (if female)            |  |    |     |      | .896 |                     |
| Yes                                                         |  | 1  | 99  | 1.0% |      | 1.10 (0.26 – 4.67)  |
| No                                                          |  | 7  | 514 | 1.4% |      | (ref)               |
| Circumcision (if male)                                      |  |    |     |      | .105 |                     |
| Collective                                                  |  | 8  | 118 | 6.8% |      | 2.62 (0.97 – 7.12)  |
| Alone                                                       |  | 9  | 305 | 3.0% |      | (ref)               |
| Circumcision not carried out by medical doctor (if male)    |  |    |     |      | -    | -                   |
| Yes                                                         |  | 17 | 228 | 7.5% |      |                     |
| No                                                          |  | 0  | 153 | 0.0% |      |                     |
| Gynaecological examination in Turkey or unsafe circumcision |  |    |     |      | .001 |                     |
| Yes                                                         |  | 18 | 330 | 5.5% |      | 6.93 (2.71 – 17.75) |
| No                                                          |  | 8  | 751 | 1.1% |      | (ref)               |
| Blood transfusion                                           |  |    |     |      | .845 |                     |

|                                                       |  |    |       |      |      |                    |
|-------------------------------------------------------|--|----|-------|------|------|--------------------|
| Yes                                                   |  | 4  | 167   | 2.4% |      | 1.12 (0.35 – 3.58) |
| No                                                    |  | 22 | 914   | 2.4% |      | (ref)              |
| Dental treatment in Turkey                            |  |    |       |      | .017 |                    |
| Yes                                                   |  | 17 | 430   | 4.0% |      | 2.84 (1.23 – 6.60) |
| No                                                    |  | 9  | 651   | 1.4% |      | (ref)              |
| Surgery in Turkey                                     |  |    |       |      | .183 |                    |
| Yes                                                   |  | 6  | 133   | 4.5% |      | 2.30 (0.91 – 5.81) |
| No                                                    |  | 20 | 948   | 2.1% |      | (ref)              |
| Treatment with needles in Turkey                      |  |    |       |      | .141 |                    |
| Yes                                                   |  | 11 | 322   | 3.4% |      | 2.06 (0.89 – 4.80) |
| No                                                    |  | 15 | 759   | 2.0% |      | (ref)              |
| Body piercing/tattooing/earlobe perforation in Turkey |  |    |       |      | .038 |                    |
| Yes                                                   |  | 4  | 327   | 1.2% |      | 0.38 (0.12 – 1.18) |
| No                                                    |  | 22 | 754   | 2.9% |      | (ref)              |
| Fish spa treatment in Turkey                          |  |    |       |      | -    | -                  |
| Yes                                                   |  | 0  | 64    | 0.0% |      |                    |
| No                                                    |  | 26 | 1,017 | 2.6% |      |                    |

Abbreviation: OR: odds ratio; CI: confidence interval; FGM: first-generation migrants; SGM: second-generation migrants.

First-generation migrants: foreign-born individuals; second-generation migrants: individuals born in Belgium with foreign-born parents;

unsafe circumcision: collective circumcision and/or circumcision not carried out by medical doctor.
