# Supplementary material for: Early detection of chronic hepatitis B and risk factor assessment in Turkish migrants, Middle Limburg, Belgium
Source: PLOS journal article supplement (doi:10.1371/journal.pone.0234740), 2020-07-27
Supplement: S12 (10.1371/journal.pone.0234740.s012) [file journal.pone.0234740.s012]

**S12 Table. Vaccination status (solely anti-HBs positive) by different risk factors among the total population with information on anti-HBs (n = 1,077) (weighted univariate GEE).**

|                              | N   | N     | Prevalence (%) | P value | Crude OR (95% CI)  |
|------------------------------|-----|-------|----------------|---------|--------------------|
| Overall                      | 247 | 1,077 | 22.9%          | -       | -                  |
| Gender                       |     |       |                | .006    |                    |
| Male                         | 84  | 466   | 18.0%          |         | 0.67 (0.50 – 0.89) |
| Female                       | 163 | 611   | 26.7%          |         | (ref)              |
| Age group                    |     |       |                | <.001   |                    |
| 18-39 years                  | 195 | 432   | 45.1%          |         | (ref)              |
| 40-59 years                  | 47  | 509   | 9.2%           |         | 0.12 (0.08 – 0.17) |
| ≥ 60 years                   | 5   | 136   | 3.7%           |         | 0.04 (0.02 – 0.11) |
| Ethnicity                    |     |       |                | <.001   |                    |
| FGM                          | 54  | 626   | 8.6%           |         | 0.13 (0.09 – 0.18) |
| SGM                          | 193 | 451   | 42.8%          |         | (ref)              |
| Year of immigration (if FGM) |     |       |                | .005    |                    |
| Before 1987                  | 22  | 361   | 6.1%           |         | 0.38 (0.21 – 0.70) |
| Year 1987 or later           | 32  | 264   | 12.1%          |         | (ref)              |
| Mother's educational level   |     |       |                | <.001   |                    |
| None                         | 67  | 567   | 11.8%          |         | 0.05 (0.02 – 0.18) |
| Primary school               | 102 | 369   | 27.6%          |         | 0.13 (0.04 – 0.46) |
| Secondary school             | 68  | 123   | 55.3%          |         | 0.40 (0.11 – 1.43) |
| High school/University       | 9   | 13    | 69.2%          |         | (ref)              |
| Vaccination history          |     |       |                | <.001   |                    |

|                        |     |     |       |  |                    |
|------------------------|-----|-----|-------|--|--------------------|
| Not vaccinated/Unknown | 108 | 837 | 12.9% |  | 0.11 (0.08 – 0.15) |
| Vaccinated             | 139 | 239 | 58.2% |  | (ref)              |

Abbreviation: OR: odds ratio; CI: confidence interval; FGM: first-generation migrants; SGM: second-generation migrants.

First-generation migrants: foreign-born individuals; second-generation migrants: individuals born in Belgium with foreign-born parents;

unsafe circumcision: collective circumcision and/or circumcision not carried out by medical doctor.
